# Supplementary material for: Changes in Plasma Phospholipid Metabolism Are Associated with Clinical Manifestations of Systemic Sclerosis
Source: MDPI journal article supplement (doi:10.3390/diagnostics11112116), 2021-11-15
Supplement: s1 [file s1]

Supplementary Information – Data Analysis

Detailed information regarding performed statistical analysis and results.

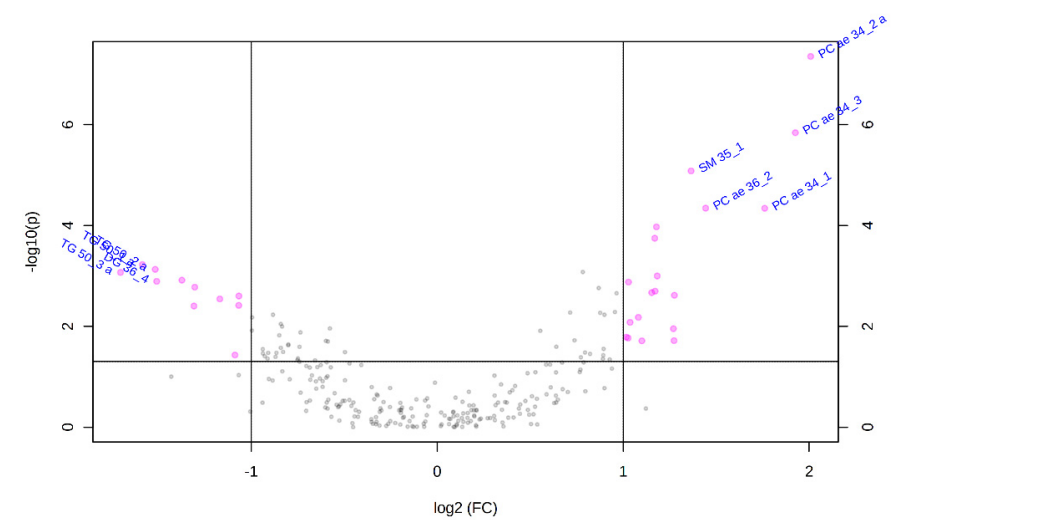

**Supplementary Figure S1.** Volcano plot indicates increased plasma levels of plasmalogens and sphingolipids in patients with SSc.

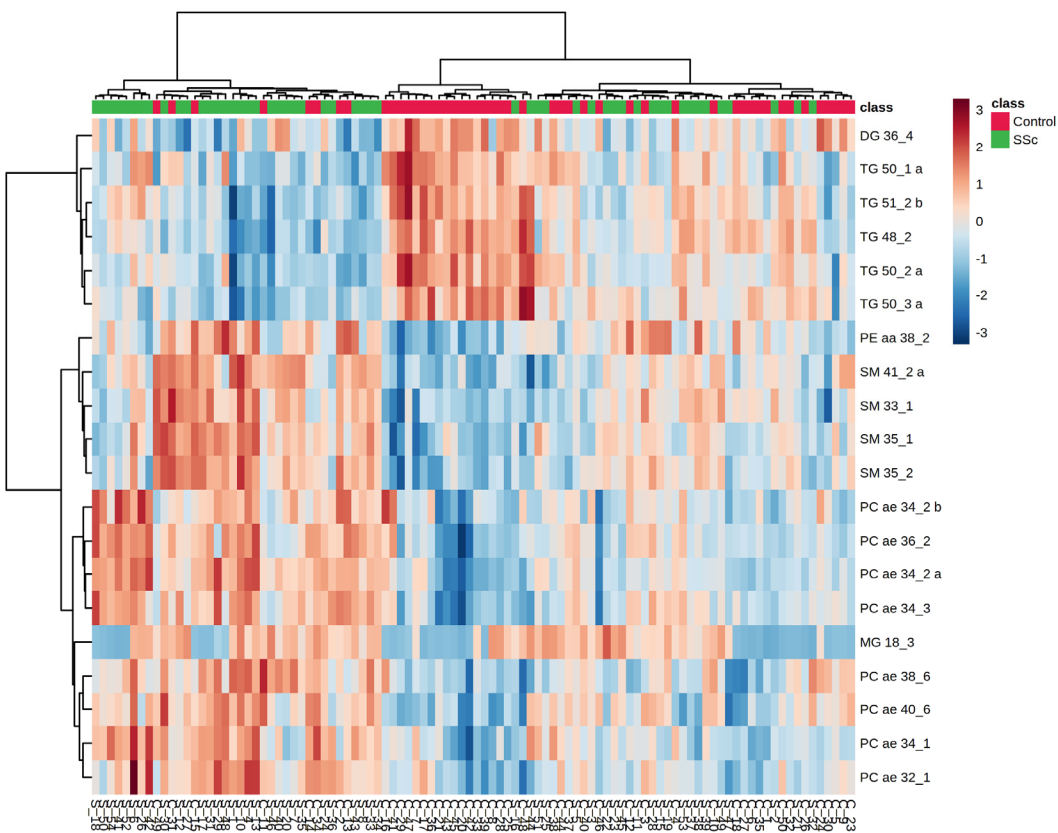

**Supplementary Figure S2.** Heatmap combined with clustering using a euclidean distance measure and ward algorithm

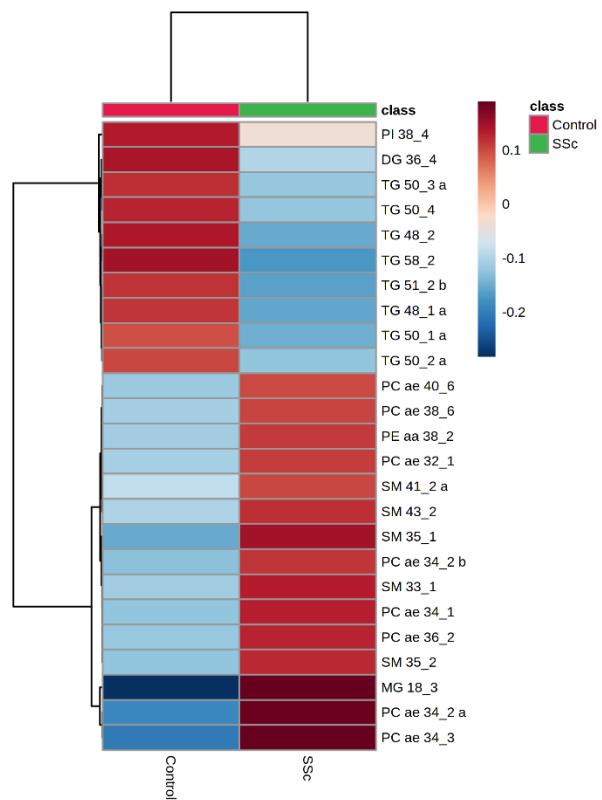

**Supplementary Figure S3.** Heatmap combined with clustering using a euclidean distance measure and ward algorithm showing only group averages.

**Supplementary Table S1.** Significant results of t-tests (p-value <0.05).

| <b>Lipid</b> | <b>t.stat</b> | <b>p.value</b> | <b>-log<sup>10</sup>(p)</b> | <b>FDR</b> |
|--------------|---------------|----------------|-----------------------------|------------|
| PC ae 34_2 a | -5.9358       | 4.43E-08       | 7.3534                      | 1.17E-05   |
| PC ae 34_3   | -5.1334       | 1.44E-06       | 5.8407                      | 0.00018979 |
| SM 35_1      | -4.707        | 8.27E-06       | 5.0825                      | 0.00072499 |
| PC ae 36_2   | -4.2697       | 4.53E-05       | 4.3439                      | 0.0023965  |
| PC ae 34_1   | -4.2681       | 4.56E-05       | 4.3414                      | 0.0023965  |
| SM 33_1      | -4.0393       | 0.00010661     | 3.9722                      | 0.004673   |
| SM 35_2      | -3.8958       | 0.00017897     | 3.7472                      | 0.0067242  |
| TG 50_1 a    | 3.5495        | 0.00059466     | 3.2257                      | 0.019549   |
| TG 50_2 a    | 3.4837        | 0.00074095     | 3.1302                      | 0.020375   |
| PE aa 38_2   | -3.4472       | 0.00083585     | 3.0779                      | 0.020375   |
| TG 50_3 a    | 3.4414        | 0.00085217     | 3.0695                      | 0.020375   |
| PC ae 38_6   | -3.3922       | 0.0010013      | 2.9994                      | 0.021945   |
| TG 51_2 b    | 3.3328        | 0.001214       | 2.9158                      | 0.023196   |
| DG 36_4      | 3.3162        | 0.0012807      | 2.8925                      | 0.023196   |
| PC ae 40_6   | -3.3061       | 0.001323       | 2.8784                      | 0.023196   |
| TG 48_2      | 3.2326        | 0.0016714      | 2.7769                      | 0.02688    |
| MG 18_3      | -3.2204       | 0.0017375      | 2.7601                      | 0.02688    |
| PC ae 32_1   | -3.1743       | 0.0020073      | 2.6974                      | 0.029006   |
| SM 41_2 a    | -3.1536       | 0.0021411      | 2.6694                      | 0.029006   |
| PC ae 34_2 b | -3.144        | 0.0022057      | 2.6564                      | 0.029006   |
| SM 43_2      | -3.1141       | 0.0024192      | 2.6163                      | 0.029887   |
| PI 38_4      | 3.1034        | 0.0025001      | 2.602                       | 0.029887   |
| TG 58_2      | 3.0593        | 0.002861       | 2.5435                      | 0.032715   |
| TG 50_4      | 2.9617        | 0.0038382      | 2.4159                      | 0.04157    |
| TG 48_1 a    | 2.952         | 0.0039515      | 2.4032                      | 0.04157    |
| PE aa 36_0   | -2.8591       | 0.0051906      | 2.2848                      | 0.050571   |
| PC ae 36_6   | -2.85         | 0.0053297      | 2.2733                      | 0.050571   |
| PE aa 38_1   | -2.8465       | 0.005384       | 2.2689                      | 0.050571   |
| PE aa 34_0   | -2.8159       | 0.0058817      | 2.2305                      | 0.051575   |
| TG 48_3      | 2.8158        | 0.0058831      | 2.2304                      | 0.051575   |
| PC ae 34_0   | -2.7743       | 0.0066257      | 2.1788                      | 0.054611   |
| TG 46_1      | 2.7732        | 0.0066447      | 2.1775                      | 0.054611   |
| SM 34_1      | -2.6928       | 0.0083352      | 2.0791                      | 0.066429   |
| TG 46_2      | 2.6661        | 0.0089761      | 2.0469                      | 0.069433   |
| PC aa 38_3   | 2.6246        | 0.010065       | 1.9972                      | 0.075629   |
| TG 46_3      | 2.5917        | 0.011009       | 1.9583                      | 0.079133   |
| PC ae 32_1 b | -2.5876       | 0.011133       | 1.9534                      | 0.079133   |
| TG 54_2      | 2.5583        | 0.012051       | 1.919                       | 0.082616   |
| SM 42_3      | -2.5521       | 0.012251       | 1.9118                      | 0.082616   |
| TG 45_2      | 2.5242        | 0.013203       | 1.8793                      | 0.086812   |
| DG 38_4 b    | 2.4744        | 0.015066       | 1.822                       | 0.096643   |
| PC ae 38_6 b | -2.4432       | 0.016347       | 1.7866                      | 0.10236    |
| SM 31_1      | -2.4271       | 0.017048       | 1.7683                      | 0.10427    |
| LPE 20_0     | -2.3863       | 0.01894        | 1.7226                      | 0.10866    |
| PC ae 32_0   | -2.381        | 0.019197       | 1.7168                      | 0.10866    |

|                       |         |          |        |         |
|-----------------------|---------|----------|--------|---------|
| PE aa 42_5            | -2.3767 | 0.019411 | 1.712  | 0.10866 |
| PC aa 36_4 a          | 2.3766  | 0.019418 | 1.7118 | 0.10866 |
| TG 58_4               | 2.3666  | 0.019916 | 1.7008 | 0.10912 |
| DG 38_9               | 2.3127  | 0.022828 | 1.6415 | 0.12253 |
| TG 44_1               | 2.2973  | 0.023731 | 1.6247 | 0.12483 |
| Octadecenoylcarnitine | -2.2704 | 0.02537  | 1.5957 | 0.12901 |
| TG 52_5               | 2.2683  | 0.025507 | 1.5933 | 0.12901 |
| TG 47_2               | 2.2503  | 0.026668 | 1.574  | 0.13233 |
| PC ae 36_5 a          | -2.2303 | 0.028011 | 1.5527 | 0.13581 |
| TG 49_1 b             | 2.2246  | 0.028402 | 1.5467 | 0.13581 |
| TG 50_5               | 2.1728  | 0.032203 | 1.4921 | 0.14709 |
| PI 36_1               | 2.1696  | 0.032456 | 1.4887 | 0.14709 |
| PC ae 36_5 b          | -2.1616 | 0.033087 | 1.4803 | 0.14709 |
| PC aa 40_4            | 2.1563  | 0.03351  | 1.4748 | 0.14709 |
| PC aa 36_3 a          | 2.1557  | 0.033557 | 1.4742 | 0.14709 |
| TG 58_5               | 2.1453  | 0.034396 | 1.4635 | 0.1483  |
| PE aa 42_6            | -2.1363 | 0.035143 | 1.4542 | 0.14908 |
| DG 34_1               | 2.1144  | 0.037015 | 1.4316 | 0.15367 |
| PE aa 40_5            | -2.1101 | 0.037395 | 1.4272 | 0.15367 |
| DG 36_1               | 2.0909  | 0.039121 | 1.4076 | 0.15829 |
| TG 45_1               | 2.0785  | 0.040275 | 1.395  | 0.16049 |
| SM 38_2               | -2.0702 | 0.041059 | 1.3866 | 0.16117 |
| TG 48_4               | 2.0475  | 0.043285 | 1.3637 | 0.16616 |
| DG 40_4               | 2.0436  | 0.043681 | 1.3597 | 0.16616 |
| PE ae 40_6 b          | -2.0382 | 0.044225 | 1.3543 | 0.16616 |
| PC ae 36_3 a          | -2.0273 | 0.045344 | 1.3435 | 0.16796 |
| DG 38_4               | 2.0156  | 0.046577 | 1.3318 | 0.17014 |
| GlcCer 38_1 OH        | 2.0085  | 0.047337 | 1.3248 | 0.17054 |

**Supplementary Table S2.** Significant results of fold changes (>2).

| <b>Lipid</b> | <b>Fold Change</b> | <b>log2(FC)</b> |
|--------------|--------------------|-----------------|
| PC ae 34_2 a | 4.0237             | 2.0085          |
| PC ae 34_3   | 3.8004             | 1.9262          |
| PC ae 34_1   | 3.3898             | 1.7612          |
| TG 50_3 a    | 0.30703            | -1.7035         |
| TG 50_1 a    | 0.33307            | -1.5861         |
| TG 50_2 a    | 0.34946            | -1.5168         |
| DG 36_4      | 0.35137            | -1.5089         |
| PC ae 36_2   | 2.7202             | 1.4437          |
| PE aa 36_2 b | 0.37106            | -1.4303         |
| TG 51_2 b    | 0.386              | -1.3733         |
| SM 35_1      | 2.5761             | 1.3652          |
| TG 48_1 a    | 0.40371            | -1.3086         |
| TG 48_2      | 0.40497            | -1.3041         |
| SM 43_2      | 2.4209             | 1.2755          |
| PC ae 32_0   | 2.4177             | 1.2736          |

|              |         |         |
|--------------|---------|---------|
| PC ae 32_1 b | 2.4121  | 1.2703  |
| PC ae 38_6   | 2.2706  | 1.1831  |
| SM 33_1      | 2.2641  | 1.1789  |
| PC ae 32_1   | 2.2529  | 1.1718  |
| SM 35_2      | 2.2501  | 1.17    |
| TG 58_2      | 0.44467 | -1.1692 |
| SM 41_2 a    | 2.2247  | 1.1536  |
| SM 44_6      | 2.177   | 1.1223  |
| PE aa 42_5   | 2.1442  | 1.1005  |
| DG 34_1      | 0.47043 | -1.0879 |
| PC ae 34_0   | 2.1166  | 1.0817  |
| PE aa 34_2   | 0.47708 | -1.0677 |
| TG 50_4      | 0.4771  | -1.0676 |
| PI 38_4      | 0.47734 | -1.0669 |
| SM 34_1      | 2.0523  | 1.0372  |
| PC ae 40_6   | 2.0402  | 1.0287  |
| SM 31_1      | 2.0378  | 1.027   |
| PC ae 38_6 b | 2.024   | 1.0172  |
| TG 55_2      | 0.4981  | -1.0055 |

---
